# Supplementary material for: Theoretical positions and approaches to resilience assessment in farming systems. A review
Source: Springer Nature journal article supplement (doi:10.1007/s13593-022-00755-x), 2022-04-01
Supplement: MOESM1 [file 13593_2022_755_MOESM1_ESM.pdf]

| main lens                                                                            | code                              | authors                                                                                                                                        | article title                                                                                                                                                   | continent                   | system under study          | system scale studied (1) | system functionality (2) | risk categories (3) | res. components assessed (4) | capacity types (5) | degree of quantification (6) | dimensions of resilience (7) |
|--------------------------------------------------------------------------------------|-----------------------------------|------------------------------------------------------------------------------------------------------------------------------------------------|-----------------------------------------------------------------------------------------------------------------------------------------------------------------|-----------------------------|-----------------------------|--------------------------|--------------------------|---------------------|------------------------------|--------------------|------------------------------|------------------------------|
| <b>Selected relevant empirical papers (not being review or meta analysis papers)</b> |                                   |                                                                                                                                                |                                                                                                                                                                 |                             |                             |                          |                          |                     |                              |                    |                              |                              |
| Agro-ecology                                                                         | A01                               | Bahadur et al. 2016                                                                                                                            | Assessing links between crop diversity and food self-sufficiency in three agroecological regions of Nepal                                                       | Asia                        | production - crop/livestock | P                        | F                        | C                   | PR                           | 0                  | 5                            | MSP                          |
|                                                                                      | A02                               | Blesh and Wittman 2015                                                                                                                         | "Brasiliense:" Assessing Resilience in Land Reform Settlements in the Brazilian Cerrado                                                                         | Latin Am                    | farming system              | S                        | FL                       | EGM                 | PR                           | 0                  | 3                            | MPE                          |
|                                                                                      | A03                               | Dendoncker 2018                                                                                                                                | How can integrated valuation of ecosystem services help understanding and steering agroecological transitions?                                                  | Europe                      | agro-ecosystem              | S                        | F                        | U                   | PR                           | 0                  | 4                            | PE                           |
|                                                                                      | A04                               | Merot 2019                                                                                                                                     | Diversity of conversion strategies for organic vineyards                                                                                                        | Europe                      | production - crop/livestock | P                        | L                        | U                   | P                            | 0                  | 5                            | MP                           |
|                                                                                      | A05                               | Stark 2018                                                                                                                                     | Crop-livestock integration determines the agroecological performance of mixed farming systems in Latino-Caribbean farms                                         | Latin Am                    | farming system              | S                        | F                        | U                   | PR                           | 0                  | 6                            | PE                           |
|                                                                                      | A06                               | Valencia 2019                                                                                                                                  | Structuring Markets for Resilient Farming Systems                                                                                                               | Latin Am                    | multiple scales             | L                        | F                        | MP                  | PR                           | 0                  | 5                            | MSPE                         |
|                                                                                      | A07                               | Vanegas 2018                                                                                                                                   | Effect of ecological and conventional managements on soil enzymatic activities in coffee agroecosystems                                                         | Latin Am                    | agro-ecosystem              | S                        | F                        | C                   | P                            | 0                  | 4                            | E                            |
|                                                                                      | A08                               | Veisi et al. 2013                                                                                                                              | A participatory assessment of agro-ecosystem sustainability in Abesard, Iran                                                                                    | Asia                        | agro-ecosystem              | S                        | EL                       | U                   | C                            | O                  | 2                            | MSE                          |
|                                                                                      | A09                               | James 2019                                                                                                                                     | Muck and Magic: A Resilience Lens on Organic Conversions as Transformation                                                                                      | Europe                      | farm                        | S                        | F                        | AMPG                | C                            | DTO                | 1                            | SE                           |
| Capacities                                                                           | C01                               | Ashkenazy 2018                                                                                                                                 | Operationalising resilience in farms and rural regions - Findings from fourteen case studies                                                                    | Europe                      | ???                         | L                        | FL                       | U                   | CPR                          | BDT                | 0                            | MSPE                         |
|                                                                                      | C02                               | Ciftcioglu 2017                                                                                                                                | Assessment of the resilience of socio-ecological production landscapes and seascapes: A case study from Lefke Region of North Cyprus                            | Europe                      | agro-ecosystem              | S                        | FL                       | N                   | CPR                          | BDT                | 2                            | MSPE                         |
|                                                                                      | C03                               | Cochrane 2018                                                                                                                                  | Does diversification enhance community resilience? A critical perspective                                                                                       | Africa                      | livelihoods - community     | L                        | FL                       | U                   | CPR                          | BDT                | 1                            | SPE                          |
|                                                                                      | C04                               | d'Errico and Di Giuseppe 2018                                                                                                                  | Resilience mobility in Uganda: A dynamic analysis                                                                                                               | Africa                      | livelihood - household      | S                        | F                        | F                   | CR                           | BDT                | 6                            | MS                           |
|                                                                                      | C05                               | Galappaththi et al. 2017                                                                                                                       | Can start-up motives influence social-ecological resilience in community-based entrepreneurship setting? Case of coastal shrimp farmers in Sri Lanka            | Asia                        | enterprise and community    | L                        | FL                       | ACM                 | CPR                          | BDT                | 2                            | MSPE                         |
|                                                                                      | C06                               | Gilioli et al. 2015                                                                                                                            | Assessment of social-ecological transitions in a peri-urban Ethiopian farming community                                                                         | Africa                      | enterprise and community    | L                        | FL                       | EF                  | CPR                          | BDTO               | 1                            | MSPE                         |
|                                                                                      | C07                               | Greig 2019                                                                                                                                     | Resilience and finances on Aotearoa New Zealand farms: Evidence from a random survey on the sources and uses of debt                                            | Oceania                     | farm                        | S                        | L                        | M                   | CR                           | BDO                | 4                            | MS                           |
|                                                                                      | C08                               | Jacobi et al. 2013                                                                                                                             | Agroecosystem resilience and farmers' perceptions of climate change impacts on cocoa farms in Alto Beni, Bolivia                                                | Latin Am                    | farming system              | S                        | L                        | AN                  | P                            | BDT                | 4                            | SPE                          |
|                                                                                      | C09                               | Jacobi et al. 2015                                                                                                                             | Farm Resilience in Organic and Nonorganic Cocoa Farming Systems in Alto Beni, Bolivia                                                                           | Latin Am                    | farming system              | S                        | L                        | C                   | CPR                          | BDT                | 2                            | MSPE                         |
|                                                                                      | C10                               | Jacobi et al. 2018                                                                                                                             | Operationalizing food system resilience: An indicator-based assessment in agroindustrial, smallholder farming, and agroecological contexts in Bolivia and Kenya | Africa +LA                  | food system                 | L                        | FL                       | U                   | CPR                          | BDO                | 4                            | MSPE                         |
| C11                                                                                  | Knickel 2018                      | Between aspirations and reality: Making farming, food systems and rural areas more resilient, sustainable and equitable                        | Europe                                                                                                                                                          | multiple scales             | L                           | F                        | U                        | P                   | BDT                          | 1                  | MPE                          |                              |
| C12                                                                                  | Oswehr et al. 2010                | Evaluating successful livelihood adaptation to climate variability and change in southern Africa                                               | Africa                                                                                                                                                          | production - crop/livestock | P                           | L                        | C                        | CPR                 | BDT                          | 1                  | MSPE                         |                              |
| C13                                                                                  | Panpakdee and Limnirankul 2017    | Indicators for assessing social-ecological resilience: A case study of organic rice production in northern Thailand                            | Asia                                                                                                                                                            | farming system              | S                           | FL                       | U                        | CPR                 | BDT                          | 4                  | MSPE                         |                              |
| C14                                                                                  | Shadbolt and Olubode-Awosola 2016 | Resilience, Risk and Entrepreneurship                                                                                                          | Oceania                                                                                                                                                         | farming system              | S                           | L                        | M                        | CP                  | BDT                          | 2                  | MSPE                         |                              |
| C15                                                                                  | Shadbolt et al. 2013              | Resilience to 'Bounce without breaking' in New Zealand dairy farm businesses                                                                   | Oceania                                                                                                                                                         | farming system              | S                           | L                        | M                        | C                   | BDT                          | 6                  | MS                           |                              |
| C16                                                                                  | Smith and Frankenberger 2018      | Does Resilience Capacity Reduce the Negative Impact of Shocks on Household Food Security? Evidence from the 2014 Floods in Northern Bangladesh | Asia                                                                                                                                                            | farming system              | S                           | L                        | N                        | CR                  | BDT                          | 6                  | MSE                          |                              |
| C17                                                                                  | Souissi 2018                      | Impact assessment of climate change on farming systems in the South Mediterranean area: a Tunisian case study                                  | Africa                                                                                                                                                          | farming system              | S                           | L                        | C                        | PR                  | BDT                          | 6                  | MSPE                         |                              |
| C18                                                                                  | Speranza 2013                     | Buffer capacity: capturing a dimension of resilience to climate change in African smallholder agriculture                                      | Africa                                                                                                                                                          | livelihood                  | S                           | L                        | C                        | CPR                 | BDTO                         | 3                  | MSPE                         |                              |
| C19                                                                                  | Speranza et al. 2014              | An indicator framework for assessing livelihood resilience in the context of social-ecological dynamics                                        |                                                                                                                                                                 | livelihood                  | S                           | L                        | CEMN                     | O                   | BDTO                         | 0                  | MSPE                         |                              |
| Traditional                                                                          | T01                               | Allen et al. 2018                                                                                                                              | Quantifying uncertainty and trade-offs in resilience assessments                                                                                                | N.America                   | agro-ecosystem              | S                        | E                        | E                   | R                            | BD                 | 2                            | SE                           |
|                                                                                      | T02                               | Borda-Rodriguez and Vicari 2014                                                                                                                | Rural co-operative resilience: The case of Malawi                                                                                                               | Africa                      | farming system              | S                        | L                        | U                   | CR                           | D                  | 1                            | MS                           |
|                                                                                      | T03                               | Borda-Rodriguez and Vicari 2015                                                                                                                | Coffee Co-Operatives in Malawi: Building Resilience through Innovation                                                                                          | Africa                      | farming system              | S                        | L                        | U                   | CR                           | D                  | 1                            | MS                           |
|                                                                                      | T04                               | Brunner and Gret-Regamey 2016                                                                                                                  | Policy strategies to foster the resilience of mountain social-ecological systems under uncertain global                                                         | Europe                      | soc.-ecological system      | L                        | EL                       | GC                  | CR                           | O                  | 6                            | MSE                          |
|                                                                                      | T05                               | Chavarria 2018                                                                                                                                 | Retaining forests within agricultural landscapes as a pathway to sustainable intensification: Evidence from Southern Ethiopia                                   | Africa                      | agro-ecosystem              | S                        | F                        | E                   | P                            | O                  | 4                            | PE                           |
|                                                                                      | T06                               | Chavas and Di Falco 2015                                                                                                                       | Resilience, Weather and Dynamic Adjustments in Agroecosystems: The Case of Wheat Yield in England                                                               | Europe                      | farming system              | S                        | F                        | N                   | P                            | O                  | 6                            | PE                           |
|                                                                                      | T07                               | de Jalon et al. 2014                                                                                                                           | Building resilience to water scarcity in southern Spain: a case study of rice farming in Doñana protected wetlands                                              | Europe                      | production - crop/livestock | P                        | F                        | CE                  | CPR                          | D                  | 6                            | MSPE                         |

| main lens     | code | authors                       | article title                                                                                                                                                                                              | continent | system under study          | system scale studied (1) | system functionality (2) | risk categories (3) | res. components assessed (4) | capacity types (5) | degree of quantification (6) | dimensions of resilience (7) |
|---------------|------|-------------------------------|------------------------------------------------------------------------------------------------------------------------------------------------------------------------------------------------------------|-----------|-----------------------------|--------------------------|--------------------------|---------------------|------------------------------|--------------------|------------------------------|------------------------------|
|               | T08  | de Roest 2018                 | Specialisation and economies of scale or diversification and economies of scope? Assessing different agricultural development pathways                                                                     | Europe    | multiple scales             | L                        | L                        | EM                  | CP                           | BDO                | 1                            | MSP                          |
|               | T09  | Diserens 2018                 | Resilience Assessment of Swiss Farming Systems: Piloting the SHARP-Tool in Vaud                                                                                                                            | Europe    | farming system              | S                        | F                        | CFMN                | CPR                          | BDT                | 3                            | MSPE                         |
|               | T10  | Douglass-Gallagher 2019       | Crop Growers' Adaptive Capacity to Climate Change: A Situated Study of Agriculture in Arizona's Verde                                                                                                      | N.America | production - crop/livestock | P                        | F                        | C                   | PR                           | D                  | 1                            | MSPE                         |
|               | T11  | Dwiartama 2017                | Resilience and transformation of the New Zealand kiwifruit industry in the face of Psa-V disease                                                                                                           | Oceania   | chain                       | L                        | F                        | A                   | CPR                          | T                  | 1                            | MSP                          |
|               | T12  | Epstein 2018                  | Recovery and adaptation after the 2015 Nepal earthquakes: a smallholder household perspective                                                                                                              | Asia      | farming system              | S                        | FL                       | N                   | CPR                          | BDO                | 5                            | MSPEO                        |
|               | T13  | Fall et al. 2018              | Exploring milk shipment data for their potential for disease monitoring and for assessing resilience in dairy farms                                                                                        | Europe    | farm                        | S                        | FL                       | A                   | O                            | D                  | 6                            | P                            |
|               | T14  | Hansson 2018                  | Farmers' mental models of change and implications for farm renewal - A case of restoration of a wetland in Sweden                                                                                          | Europe    | farm                        | S                        | L                        | P                   | R                            | O                  | 1                            | SE                           |
|               | T15  | Herman et al. 2018            | Placing resilience in context: Investigating the changing experiences of Finnish organic farmers                                                                                                           | Europe    | production - crop/livestock | P                        | FL                       | G                   | CPR                          | D                  | 1                            | MSPE                         |
|               | T16  | Kalaugher 2013                | An integrated biophysical and socio-economic framework for analysis of climate change adaptation strategies: The case of a New Zealand dairy farming system                                                | Oceania   | production - crop/livestock | P                        | F                        | CM                  | CPR                          | DO                 | 0                            | MSPE                         |
|               | T17  | Kansiime and Mastenbroek 2016 | Enhancing resilience of farmer seed system to climate-induced stresses: Insights from a case study in West Nile region, Uganda                                                                             | Africa    | farming system              | S                        | L                        | C                   | PR                           | O                  | 3                            | MSPE                         |
|               | T18  | Li et al. 2016                | Role of capitals and capabilities in ensuring economic resilience of land conservation efforts: A case study of the grain for green project in China's Loess Hills                                         | Asia      | production - crop/livestock | P                        | FL                       | P                   | CPR                          | T                  | 6                            | MSPE                         |
|               | T19  | Maleksaeidi et al. 2016       | Discovering and characterizing farm households' resilience under water scarcity                                                                                                                            | Asia      | livelihood - household      | S                        | FL                       | E                   | CPR                          | D                  | 3                            | SPEO                         |
|               | T20  | Maleksaeidi et al. 2015       | Farm households' resilience scale under water scarcity                                                                                                                                                     | Asia      | livelihood - household      | S                        | FL                       | CE                  | C                            | DO                 | 6                            | SPE                          |
|               | T21  | Marshall et al. 2012          | Transformational capacity and the influence of place and identity                                                                                                                                          | Oceania   | production - crop/livestock | P                        | E                        | C                   | C                            | DT                 | 2                            | MSPE                         |
|               | T22  | Marshall et al. 2013          | Climate change awareness is associated with enhanced adaptive capacity                                                                                                                                     | Oceania   | production - crop/livestock | P                        | FL                       | C                   | C                            | D                  | 2                            | MSPE                         |
|               | T23  | McManus et al. 2012           | Rural Community and Rural Resilience: What is important to farmers in keeping their country towns alive?                                                                                                   | Oceania   | enterprise and community    | L                        | L                        | MG                  | CR                           | D                  | 6                            | MSE                          |
|               | T24  | Meadows 2012                  | Can Birds Be Used as Tools To Inform Resilient Farming and Environmental Care in the Development of Biodiversity-Friendly Market Accreditation Systems? Perspectives of New Zealand Sheep and Beef Farmers | Oceania   | agro-ecosystem              | S                        | E                        | A                   | R                            | BO                 | 2                            | SE                           |
|               | T25  | Nettle et al. 2012            | Crisis as an opportunity for change?: A case study of applying resilience thinking to extension responses in dairy industry crisis                                                                         | Oceania   | farming system              | S                        | FL                       | CMP                 | CR                           | D                  | 1                            | MSPE                         |
|               | T26  | Nettle et al. 2015            | Empowering farmers for increased resilience in uncertain times                                                                                                                                             | Oceania   | farming system              | S                        | FL                       | CMP                 | CP                           | D                  | 1                            | MSPE                         |
|               | T27  | Nguyen and James 2013         | Measuring Household Resilience to Floods: a Case Study in the Vietnamese Mekong River Delta                                                                                                                | Asia      | farming system              | S                        | L                        | N                   | CPR                          | O                  | 2                            | MSPE                         |
|               | T28  | Phuong 2018                   | Understanding smallholder farmers' capacity to respond to climate change in a coastal community in Central Vietnam                                                                                         | Asia      | livelihood - household      | S                        | L                        | C                   | CPRO                         | D                  | 2                            | MSPE                         |
|               | T29  | Ragkos 2018                   | Labor management strategies in facing the economic crisis. Evidence from Greek livestock farms                                                                                                             | Europe    | farm                        | S                        | L                        | M                   | P                            | D                  | 2                            | M                            |
|               | T30  | Ranjan 2013                   | Mathematical modeling of drought resilience in agriculture                                                                                                                                                 |           | production - crop/livestock | P                        | L                        | N                   | PR                           | D                  | 6                            | ME                           |
|               | T31  | Rescia 2018                   | Quantitative evaluation of the spatial resilience to the B. oleae pest in olive grove socio-ecological landscapes at different scales                                                                      | Europe    | agro-ecosystem              | S                        | F                        | A                   | R                            | D                  | 5                            | PE                           |
|               | T32  | Salvia and Quaranta 2015      | Adaptive Cycle as a Tool to Select Resilient Patterns of Rural Development                                                                                                                                 | Europe    | production - crop/livestock | P                        | L                        | ACEM                | CPR                          | BD                 | 2                            | MSE                          |
|               | T33  | Sumane et al. 2018            | Local and farmers' knowledge matters! How integrating informal and formal knowledge enhances sustainable and resilient agriculture                                                                         | Europe    | farming system              | S                        | F                        | A                   | CR                           | DT                 | 1                            | MSE                          |
|               | T34  | Tittonell 2014                | Livelihood strategies, resilience and transformability in African agroecosystems                                                                                                                           | Africa    | livelihood - household      | S                        | L                        | U                   | O                            | DTO                | 4                            | MSPE                         |
| Vulnerability | V01  | Abdul-Razak and Kruse 2017    | The adaptive capacity of smallholder farmers to climate change in the Northern Region of Ghana                                                                                                             | Africa    | farming system              | S                        | L                        | C                   | CPR                          | D                  | 6                            | MS                           |
|               | V02  | Alam et al. 2018              | How do climate change and associated hazards impact on the resilience of riparian rural communities in Bangladesh? Policy implications for livelihood development                                          | Asia      | production - crop/livestock | P                        | L                        | CE                  | CPR                          | O                  | 6                            | MSP                          |
|               | V03  | Alayon-Gamboia 2011           | Vulnerability of smallholder agriculture in Calakmul, Campeche, Mexico                                                                                                                                     | Latin Am  | production - crop/livestock | P                        | L                        | N                   | CP                           | BD                 | 4                            | MSP                          |
|               | V04  | Alhassan 2019                 | Gender dimension of vulnerability to climate change and variability: Empirical evidence of smallholder farming households in Ghana                                                                         | Africa    | livelihood - household      | S                        | L                        | C                   | CPR                          | D                  | 6                            | MSPE                         |
|               | V05  | Ambelu et al. 2017            | Intervention pathways towards improving the resilience of pastoralists: A study from Borana communities, southern Ethiopia                                                                                 | Africa    | farming system              | S                        | L                        | N                   | CPR                          | D                  | 6                            | MSPE                         |
|               | V06  | Appiah 2018                   | Smallholder farmers' insight on climate change in rural Ghana                                                                                                                                              | Africa    | production - crop/livestock | P                        | L                        | C                   | P                            | O                  | 2                            | SE                           |
|               | V07  | Arslan 2018                   | Diversification Under Climate Variability as Part of a CSA Strategy in Rural Zambia                                                                                                                        | Africa    | livelihood - household      | S                        | L                        | C                   | PR                           | O                  | 6                            | MSPE                         |
|               | V08  | Below et al. 2012             | Can farmers' adaptation to climate change be explained by socio-economic household-level variables?                                                                                                        | Africa    | farming system              | S                        | EL                       | C                   | CPR                          | D                  | 6                            | MSPE                         |

| main lens | code | authors                  | article title                                                                                                                                                                                                    | continent | system under study          | system scale studied (1) | system functionality (2) | risk categories (3) | res. components assessed (4) | capacity types (5) | degree of quantification (6) | dimensions of resilience (7) |
|-----------|------|--------------------------|------------------------------------------------------------------------------------------------------------------------------------------------------------------------------------------------------------------|-----------|-----------------------------|--------------------------|--------------------------|---------------------|------------------------------|--------------------|------------------------------|------------------------------|
|           | V09  | Berry et al. 2011        | Farmer Health and Adaptive Capacity in the Face of Climate Change and Variability. Part 1: Health as a Contributor to Adaptive Capacity and as an Outcome from Pressures Coping with Climate Related Adversities | Oceania   | production - crop/livestock | P                        | EL                       | C                   | CPR                          | D                  | 6                            | MSE                          |
|           | V10  | Buelow 2018              | What You Sow Is What You Reap? (Dis-)Incentives for Adaptation Intentions in Farming                                                                                                                             | Europe    | production - crop/livestock | P                        | F                        | C                   | CO                           | D                  | 6                            | MSPEO                        |
|           | V11  | Chandra et al. 2017      | A Study of Climate-Smart Farming Practices and Climate-resiliency Field Schools in Mindanao, the Philippines                                                                                                     | Asia      | farming system              | S                        | FL                       | CN                  | P                            | D                  | 2                            | MSPE                         |
|           | V12  | Chodur 2018              | Assessing food system vulnerabilities: a fault tree modeling approach                                                                                                                                            | N.America | food system                 | L                        | F                        | GCEMN               | O                            | O                  | 1                            | MSP                          |
|           | V13  | Colting-Pulumbarit 2018  | Sustainable Livelihoods-Based Assessment of Adaptive Capacity to Climate Change: The Case of Organic and Conventional Vegetable Farmers in La Trinidad, Benguet, Philippines                                     | Asia      | production - crop/livestock | P                        | L                        | C                   | CPR                          | D                  | 6                            | MSPE                         |
|           | V14  | de Nijs 2014             | Quantification of biophysical adaptation benefits from Climate-Smart Agriculture using a Bayesian Belief Network                                                                                                 | Africa    | production - crop/livestock | P                        | F                        | C                   | PR                           | D                  | 6                            | MPE                          |
|           | V15  | Falkowski 2015           | Resilience of farmer-processor relationships to adverse shocks: the case of dairy sector in Poland                                                                                                               | Europe    | chain                       | L                        | F                        | M                   | C                            | O                  | 6                            | MP                           |
|           | V16  | Fang 2018                | Effects of natural disasters on livelihood resilience of rural residents in Sichuan                                                                                                                              | Asia      | livelihood - household      | S                        | FL                       | N                   | CR                           | O                  | 6                            | MSPE                         |
|           | V17  | Gardezi 2019             | Spatially Representing Vulnerability to Extreme Rain Events Using Midwestern Farmers' Objective and Perceived Attributes of Adaptive Capacity                                                                    | N.America | production - crop/livestock | P                        | F                        | N                   | CPR                          | DO                 | 6                            | MSPE                         |
|           | V18  | Gnonlonfoun 2019         | New indicators of vulnerability and resilience of agroforestry systems to climate change in West Africa                                                                                                          | Africa    | agro-ecosystem              | S                        | L                        | C                   | PR                           | D                  | 4                            | PE                           |
|           | V19  | Heckelman 2018           | Cultivating climate resilience: a participatory assessment of organic and conventional rice systems in the Philippines                                                                                           | Asia      | production - crop/livestock | P                        | FL                       | C                   | CPR                          | BDO                | 5                            | MSPE                         |
|           | V20  | Lawrence 2018            | Vulnerability of dryland agricultural regimes to economic and climatic change                                                                                                                                    | N.America | agro-ecosystem              | S                        | FL                       | CM                  | P                            | D                  | 6                            | MPE                          |
|           | V21  | Marshall and Stokes 2014 | Identifying thresholds and barriers to adaptation through measuring climate sensitivity and capacity to change in an Australian primary industry                                                                 | Oceania   | agro-ecosystem              | S                        | EL                       | C                   | C                            | DO                 | 2                            | MSE                          |
|           | V22  | Marshall et al. 2014b    | Social vulnerability to climate change in primary producers: A typology approach                                                                                                                                 | Oceania   | production - crop/livestock | P                        | L                        | C                   | C                            | DO                 | 2                            | MSE                          |
|           | V23  | Marshall et al. 2014a    | Transformational capacity in Australian peanut farmers for better climate adaptation                                                                                                                             | Oceania   | production - crop/livestock | P                        | L                        | C                   | CR                           | DTO                | 6                            | MSPE                         |
|           | V24  | Meldrum 2018             | Climate change and crop diversity: farmers' perceptions and adaptation on the Bolivian Altiplano                                                                                                                 | Latin Am  | farming system              | S                        | L                        | ACEN                | CPR                          | D                  | 6                            | MSPE                         |
|           | V25  | Mkonda 2018              | Comparing Smallholder Farmers' Perception of Climate Change with Meteorological Data: Experience from Seven Agroecological Zones of Tanzania                                                                     | Africa    | farming system              | S                        | FL                       | C                   | CPR                          | D                  | 2                            | PE                           |
|           | V26  | Moore et al. 2016        | Quantifying network resilience: comparison before and after a major perturbation shows strengths and limitations of network metrics                                                                              | Africa    | production - crop/livestock | P                        | F                        | C                   | R                            | DT                 | 4                            | SPE                          |
|           | V27  | Mugambiwa 2018           | Adaptation measures to sustain indigenous practices and the use of indigenous knowledge systems to adapt to climate change in Mutoko rural district of Zimbabwe                                                  | Africa    | farming system              | S                        | L                        | C                   | CPR                          | D                  | 1                            | SPE                          |
|           | V28  | Mutabazi et al. 2015     | Influence of livelihood resources on adaptive strategies to enhance climatic resilience of farm households in Morogoro, Tanzania: an indicator-based analysis                                                    | Africa    | livelihood - household      | S                        | L                        | CN                  | CPR                          | BD                 | 6                            | MSPE                         |
|           | V29  | Nguyen 2018              | How do local communities adapt to climate changes along heavily damaged coasts? A Stakeholder Delphi study in Ky Anh (Central Vietnam)                                                                           | Asia      | livelihoods - community     | L                        | L                        | C                   | CPR                          | DO                 | 6                            | MSPE                         |
|           | V30  | Perez et al. 2015        | How resilient are farming households and communities to a changing climate in Africa? A gender-based perspective                                                                                                 | Africa    | ???                         | O                        | FL                       | CGMP                | CPR                          | D                  | 3                            | MSPE                         |
|           | V31  | Safi et al. W 2012       | Rural Nevada and Climate Change: Vulnerability, Beliefs, and Risk Perception                                                                                                                                     | N.America | production - crop/livestock | P                        | L                        | C                   | CR                           | DO                 | 6                            | SE                           |
|           | V32  | Sieber et al. 2015       | Integrated assessment of sustainable agricultural practices to enhance climate resilience in Morogoro, Tanzania                                                                                                  | Africa    | production - crop/livestock | P                        | F                        | CF                  | CP                           | DO                 | 2                            | MSPE                         |
|           | V33  | Simane and Zaitchik 2014 | The Sustainability of Community-Based Adaptation Projects in the Blue Nile Highlands of Ethiopia                                                                                                                 | Africa    | production - crop/livestock | P                        | FL                       | C                   | CPR                          | DO                 | 5                            | MSPE                         |
|           | V34  | Simane et al. 2016       | Agroecosystem specific climate vulnerability analysis: application of the livelihood vulnerability index to a tropical highland region                                                                           | Africa    | livelihood                  | S                        | L                        | C                   | CPR                          | D                  | 5                            | MSPE                         |
|           | V35  | Stock 2019               | Let the people speak: improving regional adaptation policy by combining adaptive capacity assessments with vulnerability perceptions of farmers in Gujarat, India                                                | Asia      | farm                        | S                        | L                        | CN                  | CPR                          | D                  | 3                            | MSPE                         |
|           | V36  | Wassie 2018              | Evaluating smallholder farmers' preferences for climate smart agricultural practices in Tehuledere District, northeastern Ethiopia                                                                               | Africa    | production - crop/livestock | P                        | FL                       | C                   | C                            | D                  | 1                            | P                            |
|           | V37  | Webb et al. 2013         | Integrating biophysical and socio-economic evaluations to improve the efficacy of adaptation assessments for agriculture                                                                                         | Oceania   | agro-ecosystem              | S                        | F                        | C                   | P                            | D                  | 6                            | MPE                          |
|           | V38  | Alston et al. 2018       | Limits to adaptation: Reducing irrigation water in the Murray-Darling Basin dairy communities                                                                                                                    | Oceania   | production - crop/livestock | P                        | EL                       | N                   | CR                           | DT                 | 0                            | MSPE                         |
| Othe      | O01  | Acosta-Alba 2019         | The LCA4CSA framework: Using life cycle assessment to strengthen environmental sustainability analysis of climate smart agriculture options at farm and crop system levels                                       | Latin Am  | production - crop/livestock | P                        | F                        | CE                  | P                            | O                  | 6                            | PE                           |

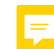

| main lens | code | authors                    | article title                                                                                                                                            | continent | system under study          | system scale studied (1) | system functionality (2) | risk categories (3) | res. components assessed (4) | capacity types (5) | degree of quantification (6) | dimensions of resilience (7) |
|-----------|------|----------------------------|----------------------------------------------------------------------------------------------------------------------------------------------------------|-----------|-----------------------------|--------------------------|--------------------------|---------------------|------------------------------|--------------------|------------------------------|------------------------------|
| art       | O02  | Astier et al. 2011         | Sustainability indicators, alternative strategies and trade-offs in peasant agroecosystems: analysing 15 case studies from Latin America                 | Latin Am  | farming system              | S                        | F                        | M                   | PR                           | O                  | 4                            | SP                           |
|           | O03  | Bardsley and Bardsley 2014 | Organising for socio-ecological resilience: The roles of the mountain farmer cooperative Genossenschaft Gran Alpin in Graubünden, Switzerland            | Europe    | farming system              | S                        | EL                       | AMP                 | P                            | O                  | 2                            | MSPE                         |
|           | O04  | Hamerlinck 2014            | Country-specific analysis of competitiveness and resilience of organic and low input dairy farming across Europe                                         | Europe    | farming system              | S                        | L                        | M                   | P                            | O                  | 6                            | MP                           |
|           | O05  | Quandt 2018                | Measuring livelihood resilience: The Household Livelihood Resilience Approach (HLRA)                                                                     | Africa    | livelihood - household      | S                        | L                        | C                   | PR                           | D                  | 5                            | MSPE                         |
|           | O06  | Valenti 2018               | Indicators of sustainability to assess aquaculture systems                                                                                               | Latin Am  | farming system              | S                        | F                        | AEGMP               | PR                           | O                  | 3                            | M                            |
|           | O07  | Panpakdee et al. 2017      | Developing Social-ecological Resilience Indicators of Organic Rice Production through Intergrating Resilience Theories with Social Sciences' Disciplines | Asia      | production - crop/livestock | P                        | FL                       | A                   | CPR                          | D                  | 4                            | MSPE                         |

### Review papers and meta studies (R-)

|               |       |                         |                                                                                                                                                                          |           |                               |   |    |      |     |     |   |       |
|---------------|-------|-------------------------|--------------------------------------------------------------------------------------------------------------------------------------------------------------------------|-----------|-------------------------------|---|----|------|-----|-----|---|-------|
| Capacities    | R-C01 | Aboah 2019              | Operationalising resilience in tropical agricultural value chains                                                                                                        |           | chain                         | L | F  | M    | PR  | DTO | 5 | MSPE  |
|               | R-C02 | Béné et al. 2014        | Review Article: Resilience, Poverty and Development                                                                                                                      |           | n.a.                          | O | L  | F    | CR  | BDT | 0 | O     |
|               | R-C03 | Béné et al. 2015        | Is resilience a useful concept in the context of food security and nutrition programmes? Some conceptual and practical considerations                                    |           | production - crop/livestock   | P | FL | U    | CPR | BDT | 0 | MSPEO |
|               | R-C04 | Cabell and Oelofse 2012 | An indicator framework for assessing agroecosystem resilience                                                                                                            |           | agro-ecosystem                | S | F  | G    | CPR | BDT | 4 | MSPE  |
|               | R-C05 | Carpenter et al. 2012   | General Resilience to Cope with Extreme Events                                                                                                                           |           | soc-ecological system         | L | -  | UAMN | CRO | BDT | 0 | MSE   |
| Other         | R-O01 | Alroe 2017              | Performance versus Values in Sustainability Transformation of Food Systems                                                                                               |           | food system                   | L | FL | C    | O   | O   | 2 | MSPE  |
| Traditional   | R-T01 | Macfadyen et al. 2015   | The role of food retailers in improving resilience in global food supply                                                                                                 |           | food system                   | L | F  | CGM  | PR  | B   | 1 | MPE   |
|               | R-T02 | Peterson et al. 2018    | Ways forward for resilience research in agroecosystems                                                                                                                   |           | agro-ecosystem                | S | F  | CE   | P   | O   | 1 | P     |
|               | R-T03 | Quinlan et al. 2016     | Measuring and assessing resilience: broadening understanding through multiple disciplinary perspectives.                                                                 |           | variety of systems            | L | -  | -    | O   | O   | 0 | MSPE  |
|               | R-T04 | ten Napel et al. 2011   | A conceptual approach to design livestock production systems for robustness to enhance sustainability                                                                    | Europe    | production - crop/livestock   | P | F  | U    | O   | BDT | 0 | MSPE  |
|               | R-T05 | Darnhofer et al. 2016   | The resilience of family farms: Towards a relational approach                                                                                                            | Europe    | production - crop/livestock   | P | F  | U    | CPR | BD  | 1 | MSPE  |
| Vulnerability | R-V01 | Bailey and Buck 2016    | Managing for resilience: a landscape framework for food and livelihood security and ecosystem services                                                                   |           | production - crop/livestock   | P | L  | CE   | CP  | D   | 0 | MSPE  |
|               | R-V02 | Brzezina 2016           | Can Organic Farming Reduce Vulnerabilities and Enhance the Resilience of the European Food System? A Critical Assessment Using System Dynamics Structural Thinking Tools | Europe    | food system                   | L | F  | AEM  | CPR | O   | 1 | MSPE  |
|               | R-V03 | Elias 2018              | Diverse landscapes, diverse risks: synthesis of the special issue on climate change and adaptive capacity in a hotter, drier Southwestern United States                  | N.America | region/coll.of agric. systems | L | F  | C    | CR  | D   | 0 | MPE   |
|               | R-V04 | Hansen 2019             | Climate risk management and rural poverty reduction                                                                                                                      |           | farming system                | S | L  | C    | PR  | O   | 1 | MSP   |
|               | R-V05 | Vroegindewey 2018       | Resilience of Agricultural Value Chains in Developing Country Contexts: A Framework and Assessment Approach                                                              |           | chain                         | L | F  | M    | CRO | D   | 2 | M     |

(1) System scale studied: F= farming; S= farming/agro-ecosystem; L= larger system

(2) System functionality: F= food production; L= livelihood/income; E= ecosystem services

(3) Risk categories: A= production disturbances; C= climate change; E= environmental, land & water disturbances; F= food insecurity and poverty; G= global drivers and context changes; M= market & supply chain disturbances; N= natural disasters and extreme weather events; P= policy changes;

(4) Components of resilience assessed (C= capacities; P= practices; R= resources; O= other

(5) Capacity types: B= absorptive/buffering; D= adaptive; T= transformative; O= other

(6) Degree of quantification: 1. Perceptions/judgements of observer or interviewee - descriptive without evidence of scale or justification for judgement; 2. Scoring of indicators without distinct categories; 3. Scoring using distinct categories; 4. Measured indicators without computation of

(7) Dimensions of resilience: M= economic, S= social, E= environmental, P= production, O= other
